# Supplementary material
Source: publisher figshare collection journal article supplement (https://acs.figshare.com/ndownloader/files/3917046)
Supplement: Supplementary file 1 [file 3917046]

# Impact of template choice on homology model quality and its efficiency in virtual screening

Krzysztof Rataj<sup>†</sup>, Jagna Witek<sup>†</sup>, Stefan Mordalski<sup>†</sup>, Tomasz Kosciolk<sup>§</sup>, Andrzej J. Bojarski<sup>†\*</sup>

<sup>†</sup>Institute of Pharmacology, Polish Academy of Sciences, 12 Smętna Street, 31-343 Krakow, Poland

<sup>§</sup>Present address: Institute of Structural and Molecular Biology, University College London, Gower Street, London, WC1E 6BT, United Kingdom

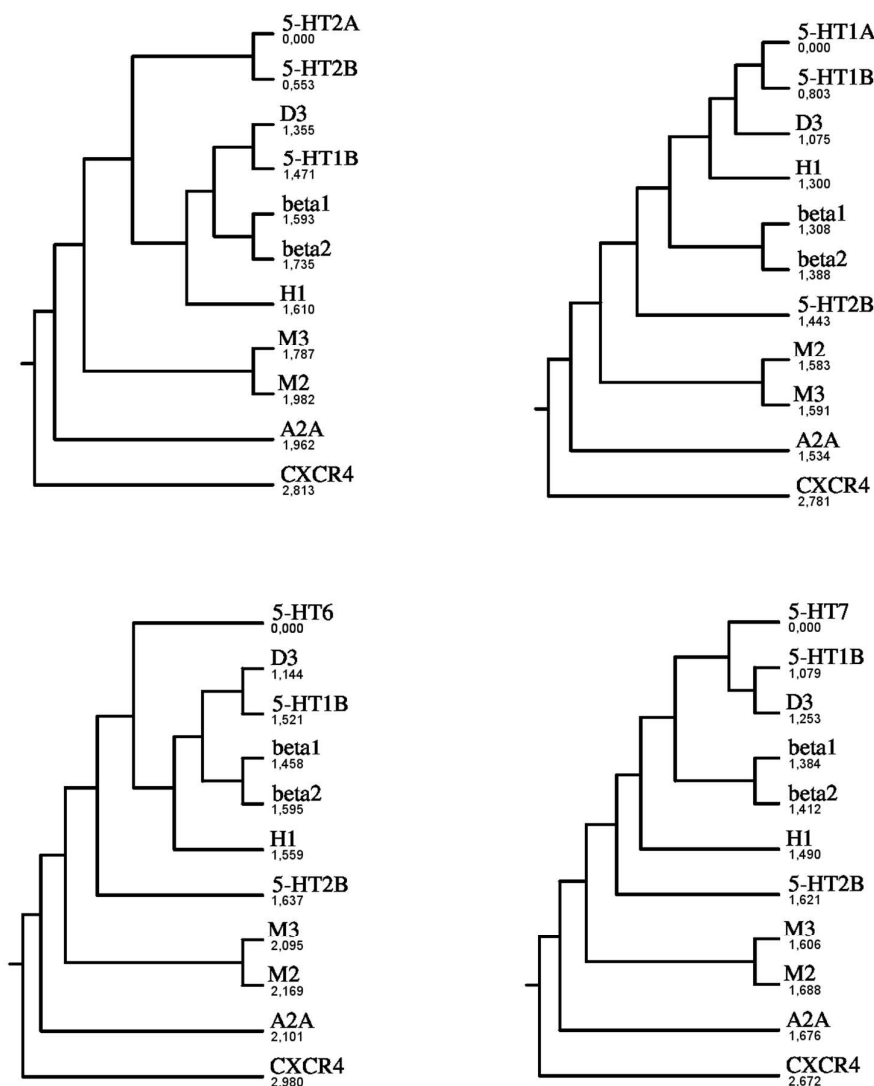

**Figure S1.** Phylogenetic trees of target serotonin receptors and available GPCR templates, including evolutionary distances. The distances were calculated using the *protdist* application from the mobyle@pasteur metasever. The tree was created using the *neighbor* application. The default *protdist* settings were used, and the UPGMA Distance Method was used in *neighbor*.



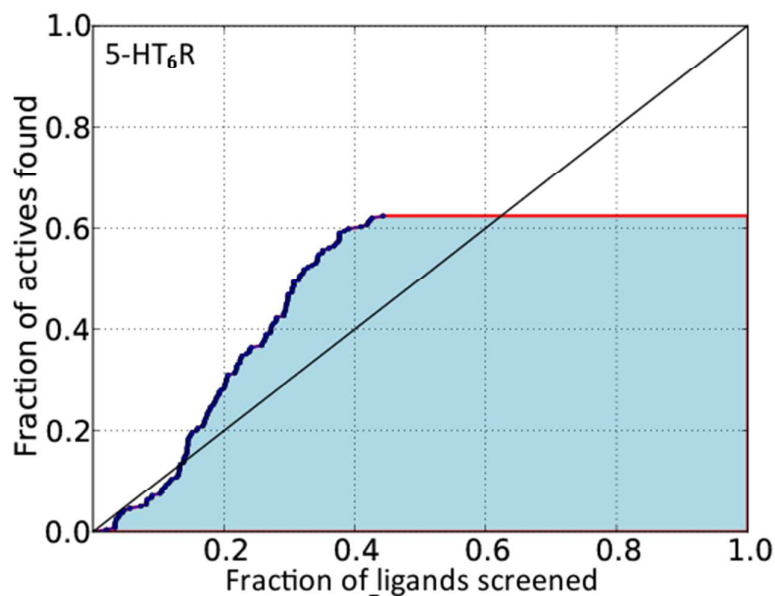

**Figure S3.:** ROC curve of a 5-HT<sub>6</sub>R model based on automatic alignment and single model generation. The AUROC value equals 0.530.

**Table S1.:** Sequence identity and similarity of the 7TM regions of 5-HT<sub>6</sub> and template proteins, calculated using the GPCRDB Similarity tool.<sup>1</sup> The best template, the adrenergic beta2 receptor, is shown in **bold**.

| Template                         | Identity (%) | Similarity (%) | Simscore   |
|----------------------------------|--------------|----------------|------------|
| Adrenergic beta1 receptor        | 43           | 60             | 423        |
| Serotonin 1B receptor            | 38           | 57             | 377        |
| <b>Adrenergic beta2 receptor</b> | <b>38</b>    | <b>56</b>      | <b>374</b> |
| Adenosine A2A receptor           | 36           | 56             | 356        |
| Histamine 1 receptor             | 36           | 55             | 343        |
| <i>Dopamine 3 receptor</i>       | 39           | 53             | 373        |
| Serotonin 2B receptor            | 36           | 51             | 323        |
| Muscarine 3 receptor             | 32           | 48             | 252        |
| Muscarine 2 receptor             | 30           | 46             | 229        |
| CXC chemokine receptor type 4    | 25           | 41             | 157        |

**Table S2.:** Sequence identity and similarity of the ligand-accessible regions of 5-HT<sub>6</sub> and template proteins, calculated with GPCRDB Similarity tool.<sup>1</sup> The best template, adrenergic beta2 receptor, is shown in **bold**.

| Template                         | Identity (%) | Similarity (%) | Simscore   |
|----------------------------------|--------------|----------------|------------|
| Serotonin 1B receptor            | 55           | 75             | 145        |
| Adrenergic beta1 receptor        | 48           | 73             | 133        |
| Adenosine A2A receptor           | 50           | 73             | 121        |
| Histamine 1 receptor             | 50           | 68             | 118        |
| <b>Adrenergic beta2 receptor</b> | <b>45</b>    | <b>68</b>      | <b>127</b> |
| Serotonin 2B receptor            | 50           | 64             | 117        |
| <i>Dopamine 3 receptor</i>       | <i>48</i>    | <i>64</i>      | <i>115</i> |
| Muscarine 3 receptor             | 30           | 50             | 66         |
| Muscarine 2 receptor             | 32           | 50             | 68         |
| CXC chemokine receptor type 4    | 14           | 41             | 27         |

**Table S3.:** RMSD values of whole models (blue) and their binding sites (grey) for the best 5-HT<sub>6</sub>R models. The results for 5-HT<sub>1B</sub>R templates are omitted, due to their high RMSD values.

| RMSD  |       |       |       |       |       |       |       |
|-------|-------|-------|-------|-------|-------|-------|-------|
|       | A2A   | Beta2 | CXCR4 | D3    | H1    | M2    | M3    |
| A2A   | 1     | 1.585 | 2.304 | 1.628 | 1.966 | 2.481 | 2.065 |
| Beta2 | 1.137 | 1     | 1.773 | 1.176 | 1.201 | 1.732 | 1.366 |
| CXCR4 | 1.267 | 0.787 | 1     | 1.262 | 1.21  | 1.422 | 1.612 |
| D3    | 1.117 | 0.764 | 1.098 | 1     | 1.028 | 1.161 | 1.216 |
| H1    | 1.285 | 0.821 | 1.366 | 0.633 | 1     | 1.078 | 0.847 |
| M2    | 1.255 | 0.895 | 1.419 | 0.633 | 0.498 | 1     | 0.538 |
| M3    | 1.139 | 0.967 | 1.145 | 1.368 | 1.446 | 1.35  | 1     |

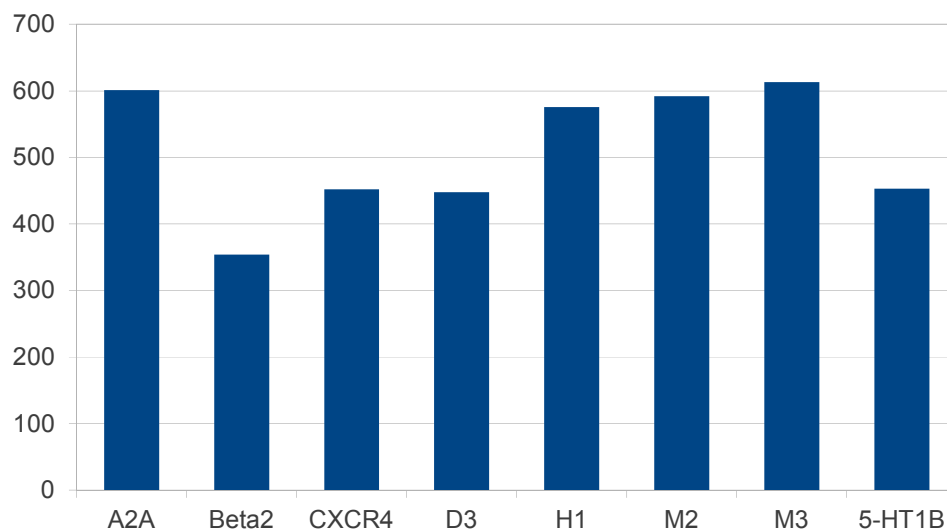

**Figure S4.:** Volumes of the binding pockets of the best 5-HT<sub>6</sub>R models (in cubic angstroms), as calculated by the SiteMap<sup>2</sup> application.

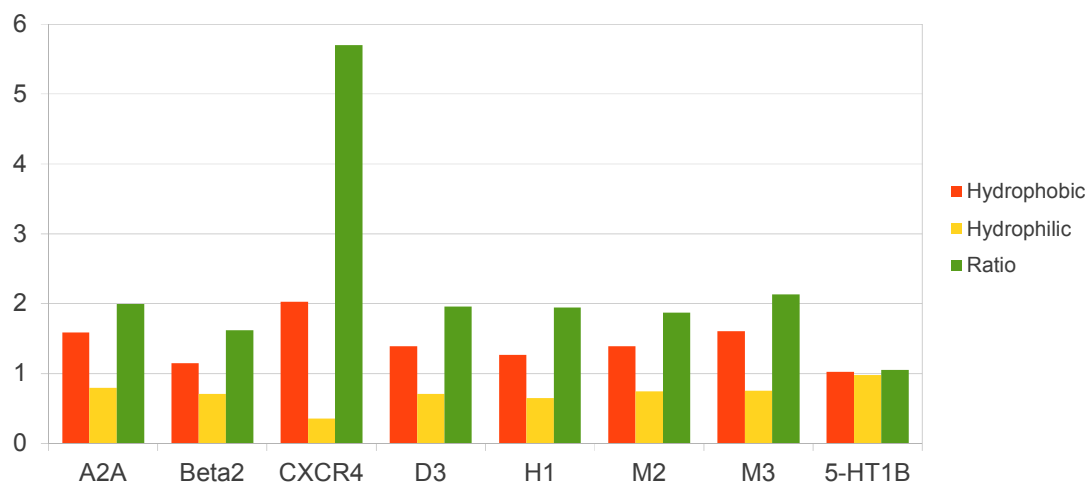

**Figure S5.:** Hydrophobic and hydrophilic areas of the binding pockets of best 5-HT<sub>6</sub>R models, as calculated by the SiteMap<sup>2</sup> application.

### Explanation for the number of models created

We believe that building more than 200 models per template is not only far too resource and time consuming, but also structures created in such a manner are redundant, due to the limited conformational spaces occupied by amino acid residues. To prove this, we built 1000 models of 5-HT<sub>6</sub> receptor using beta2-adrenergic template, and compared the conformational spaces of the residues mentioned in mutagenesis data in the manuscript.

One of the most simple ways to describe the relative position of an amino acid residue is to calculate 2 angles it forms with the helix backbone, explicitly with the preceding and the following amino acid. Based on those angles it is possible to triangulate the position of the amino acid residue in a 3-dimensional space. Therefore, for each residue we calculated  $C\alpha_1$ - $C\alpha_2$ -Residue angles, where the  $C\alpha_1$  point is the backbone carbon of preceding or following amino acid, the  $C\alpha_2$  is the backbone carbon of the selected amino acid, and the Residue point are the coordinates of specific atom group, selected manually for each amino acid (Figure 1):

D3.32 – The carbon atom in the COO- group

C3.36 – The sulphur atom

S5.43 – The oxygen atom in the OH group

T5.46 – The oxygen atom in the OH group

W6.48 – The center of the indol group

F6.52 – The center of the phenyl ring

N6.55 – The nitrogen in the NH2 group

The S6.34 amino acid was omitted, due to its position in the protein (on the cellular side of the GPCR – it would not affect ligand binding).

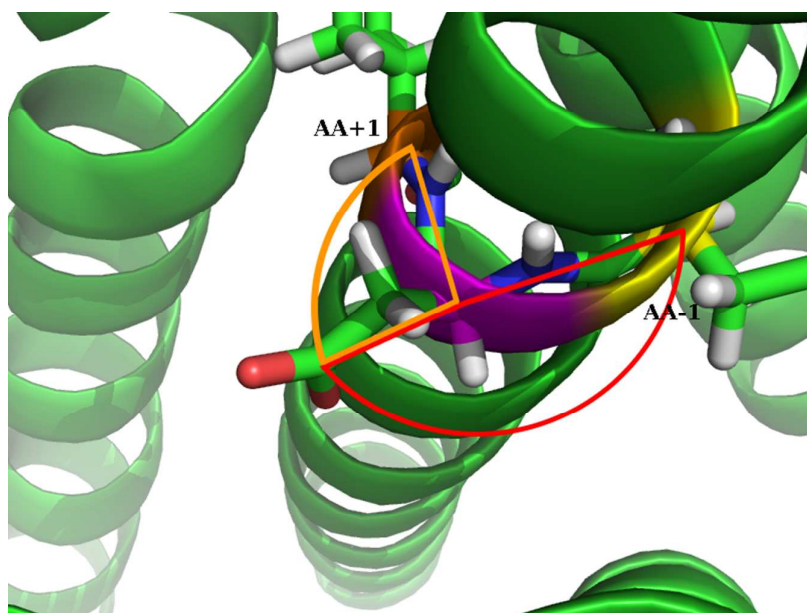

**Figure S6.:** The representation of the angles measured for the description of relative positions of amino acids.

The aforementioned angles were calculated for each of those amino acids, however we show only the results for D3.32, to maintain the clarity (Figure S7):



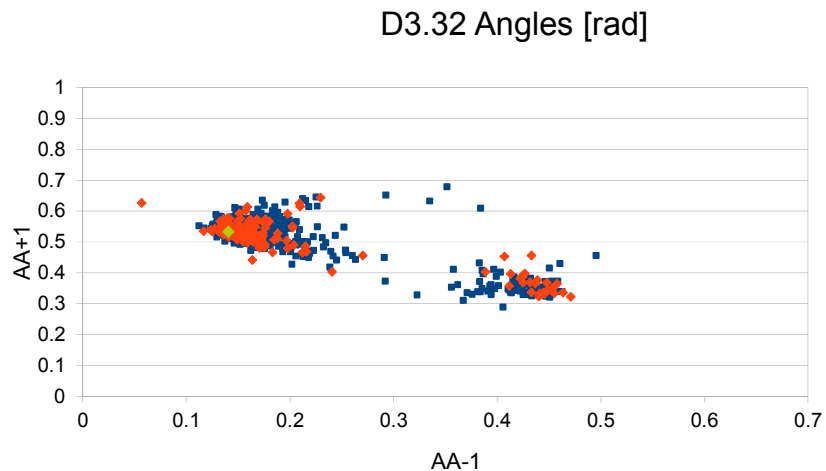

**Figure S7:** A chart representing the relative positions of amino acid residues, based on the  $\text{Ca1Ca2Residue}$ , where  $\text{Ca2}$  is the  $\text{Ca}$  of the target amino acid,  $\text{Ca1}$  is the  $\text{Ca}$  of the previous amino acid (AA-1) or the following amino acid (AA+1) in the protein sequence. The original 200 models are marked in red, the additionally built 1000 models are marked in blue, and the best model from the original set is marked in green.

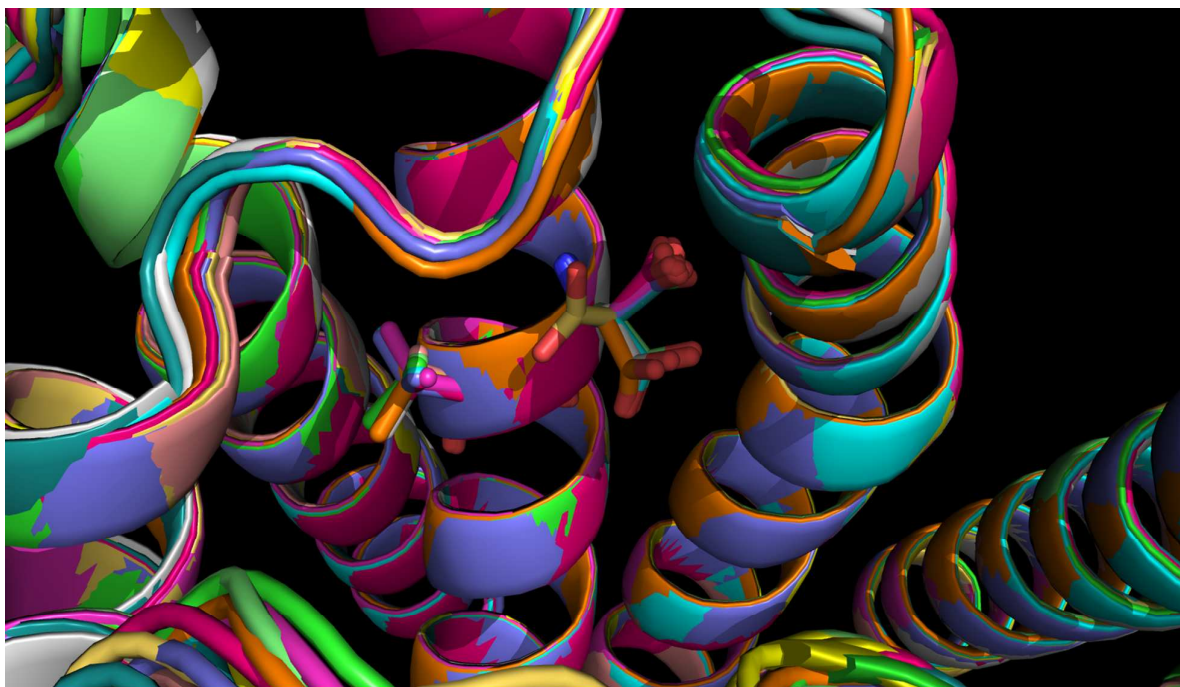

**Figure S8:** The visualization of the alignment of 10 random models of the 5-HT<sub>6</sub>R protein. The 2 main conformations of the D3.32 amino acid are shown, along with one conformation that is outside of the two available conformational spaces (yellow). This image shows that the angle-based approach is valid for the depiction of the relative residue position.

As it is observable, the amino acid has a set of allowed conformations, which are densely populated, and only a few positions that stand outside of those regions (Figure S8). It is then safe to assume, that such amino acid conformations are those of higher energy, and therefore less probable to exist in the native protein. What we can also see, is that building 1000 models did not reveal any new available conformations, but only populated the existing ones much more densely. What is also worth noticing, the amount of “artefacts” increased greatly with the higher amount of models generated. As both the best model generated (the one with the highest AUROC score) and the worst one (the one with the lowest amount of ligands docked in the 1st step of validation) had the vital amino acids' positions within the range of the allowed conformations, it is our opinion, that building additional models is redundant.

## AUTHOR INFORMATION

### Corresponding Author

\* *Andrzej J. Bojarski*

bojarski@if-pan.krakow.pl

Smętna 12, PL 31-343 Kraków, Poland

## References

- (1) Isberg, V.; Vroling, B.; van der Kant, R.; Li, K.; Vriend, G.; Gloriam, D. GPCRDB: an information system for G protein-coupled receptors. *Nucleic Acids Res.* **2014**, *42*, D422–425.
- (2) SiteMap, version 2.6, Schrödinger, LLC, New York, NY, 2012.
